# Supplementary material for: Mutant IDH1 regulates the tumor-associated immune system in gliomas
Source: PubMed Central journal article supplement — Genes Dev. 2017 Apr 15;31(8):774–86. doi: 10.1101/gad.294991.116 (PMC5435890; doi:10.1101/gad.294991.116), 2017-04-15
Supplement: supp_gad.294991.116_Supplemental_data.pdf [file supp_gad.294991.116_Supplemental_data.pdf]

**Supplemental Fig. S1.** Classification of the TCGA human LGGs.

**Supplemental Fig. S2.**

Visualization of gene ontology categories in a two dimensional scatterplot, derived by applying multidimensional scaling to a matrix of the GO terms' semantic similarities. The size of the bubble indicates the frequency of the GO term whereas the color of the bubble indicates the p-value.

**Supplemental Fig. S3.** *mutIDH1*-expressing mouse gliomas.

(A) The cartoon describes preparing *wtIDH1* and *mutIDH1* gliomas. (B) and (C) Tumor genotyping. Tumor DNA was isolated from control gliomas (lack of *wtIDH1* and *mutIDH1*), *wtIDH1* gliomas, and *mutIDH1* gliomas. Then, a gene locus containing *IDH1* R132H mutation site was amplified using PCR, and PCR products were analyzed in a 2% agarose gel. Due to the absence of human *IDH1* in the control DNA, the product band was missing. DNA bands were then cut and DNA was extracted for sequencing to genotype *IDH1* mutation status. *mutIDH1* tumor DNA had the same mutation as the RCAS-*mutIDH1*-H1-shP53 vector

**Supplemental Fig. S4.** Immunohistochemistry of *Ink4a/Arf*<sup>-/-</sup> *mutIDH1* and *wtIDH1* gliomas for Olig2, Ki67, CD31 (n = 3 for each subtype).

**Supplemental Fig. S5.** Immunohistochemistry using 5-mc antibody. The different pictures represent two different mice in each group.

**Supplemental Fig. S6.** REVIGO plots using upregulated (A) and downregulated (B) genes in *mutIDH1* mouse gliomas.

**Supplemental Fig. S7** Representative gating FACS plots to identify each immune cell type in mouse brain tumors.

**Supplemental Fig. S8** Gene expressions of CCL-2, CXCL-2, and C5 in *mutIDH1* human glioma (TS603) relative to *wtIDH1* human glioma cells (U3039, U3046, and U3065) *in vitro*. Error bars show the SD.

**Supplemental Fig. S9.** (A) Schedule for the antibody treatment for the neutrophil depletion in *wtIDH1* and *mutIDH1* glioma-bearing mice. (B) Flow analysis of peripheral blood showing the depletion of Ly6G<sup>+</sup> neutrophils in the treatment group (1A8) compared to the isotype control group (2A8). (D) *Ntva*<sub>1</sub>*Ink4a/Arf*<sup>+/-</sup> mice with *wtIDH1* and *mutIDH1* gliomas were treated with an anti-Ly6g (1A8) or isotype control (2A3) antibody to deplete the neutrophil populations. We observed no significant effect on *mutIDH1* tumors, however saw a significant survival benefit for *wtIDH1* tumors.

**Supplemental Table S1.** Distribution of glioma grades among the three subtypes (*wtIDH1*, *mutIDH1* OD, *mutIDH1* AS) in the TCGA samples analyzed

**Supplemental Table S2.** List of GO terms associated with upregulated genes in muIDH1 human LGG.

**Supplemental Table S3.** List of GO terms associated with downregulated genes in muIDH1 human LGG.

**Supplemental Table S4.** List of GO terms associated with downregulated genes overlapping between human and mouse data.

**Supplemental Table S5.** List of dye-conjugated antibodies used for mouse immune cells.

GENESDEV/2016/294991\_Amankulor\_Supplementary Fig. 1

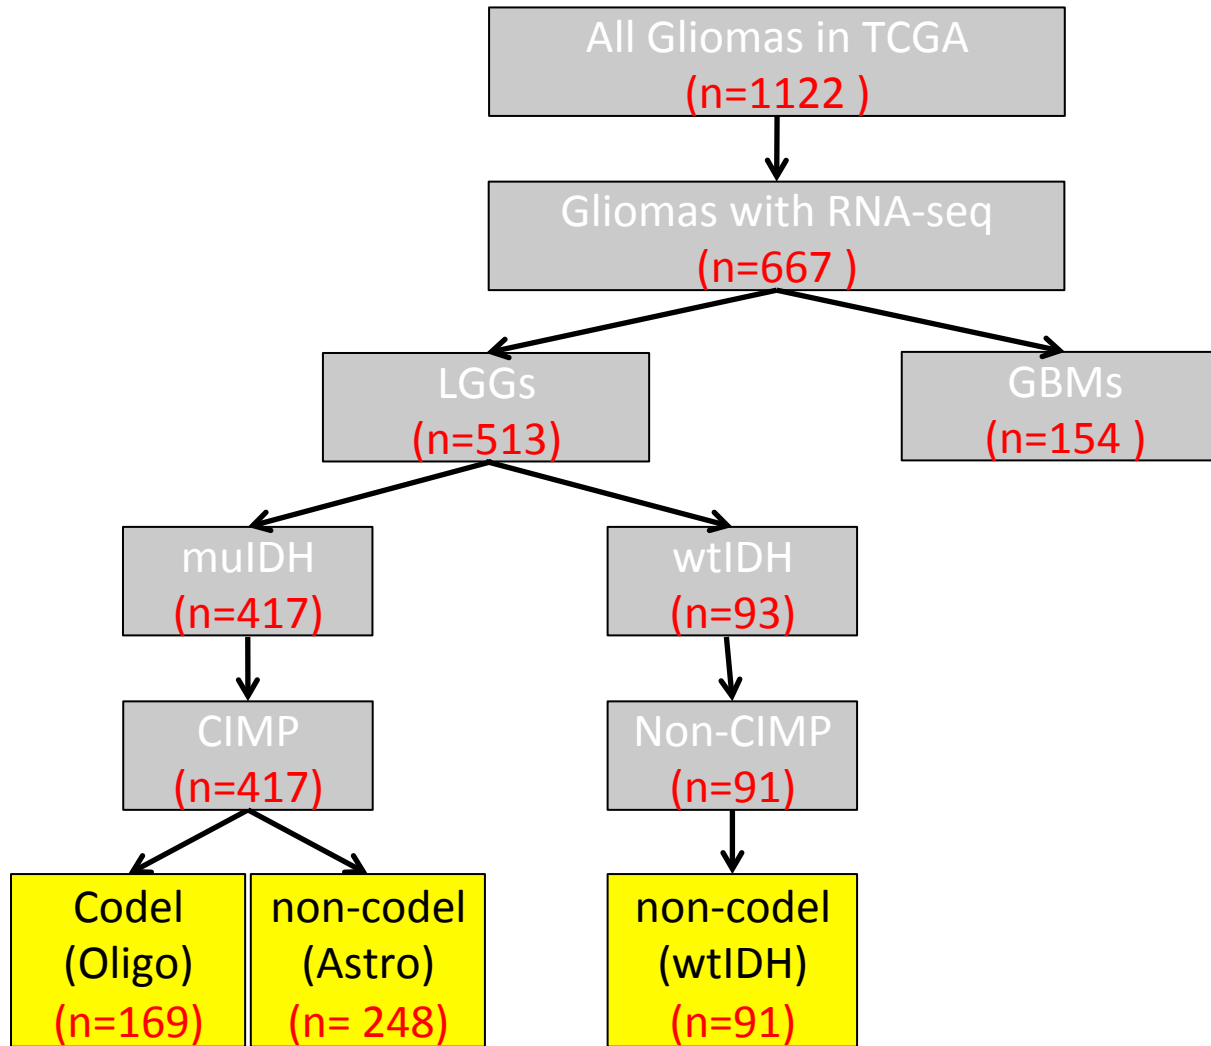

# GENESDEV/2016/294991\_Amankulor\_Supplementary Fig. 2

A

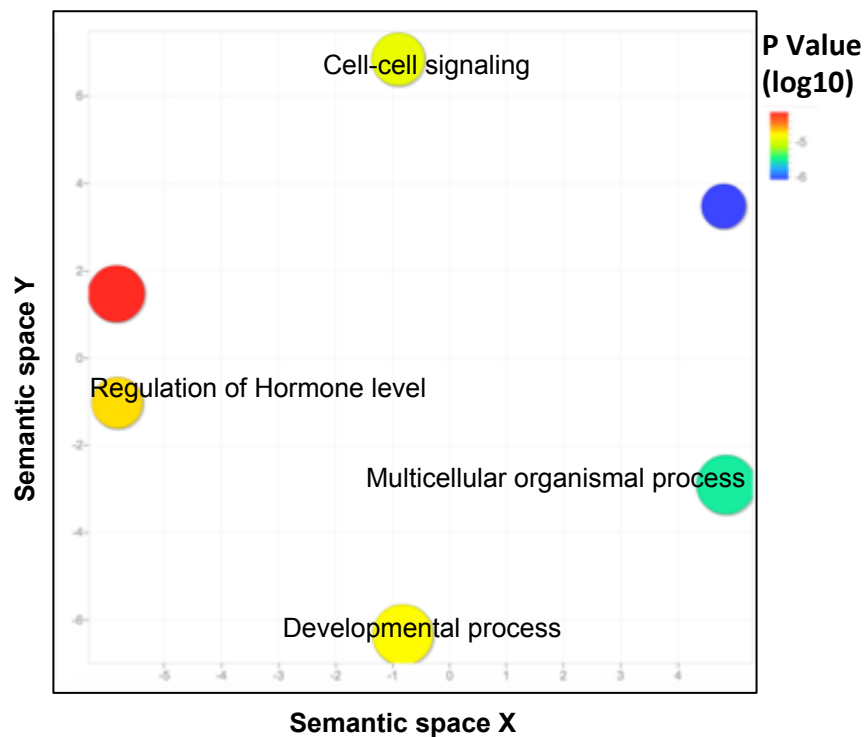

B

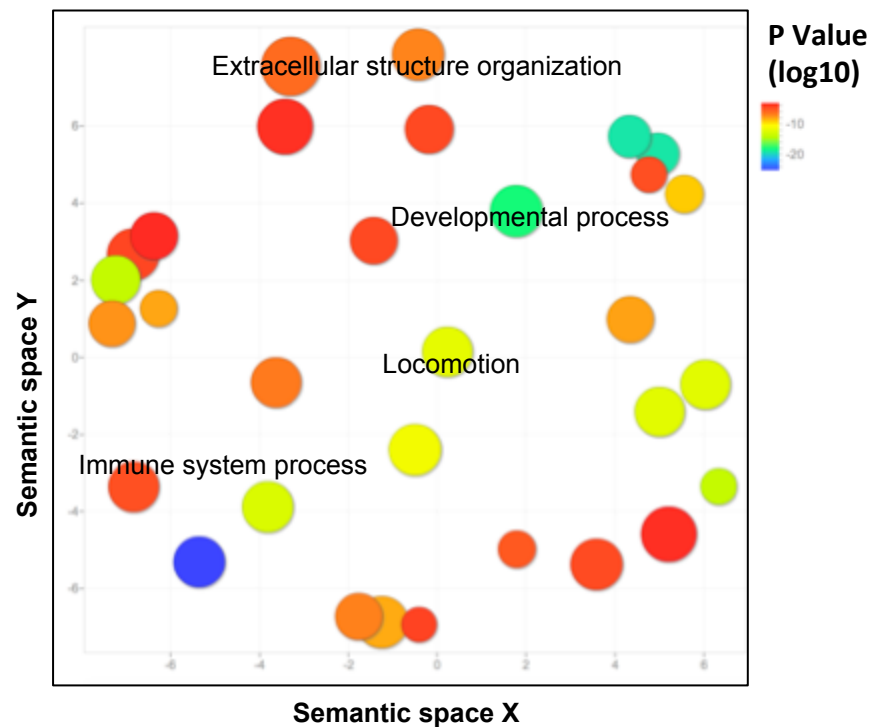

GENESDEV/2016/294991\_Amankulor\_Supplementary Fig. 3

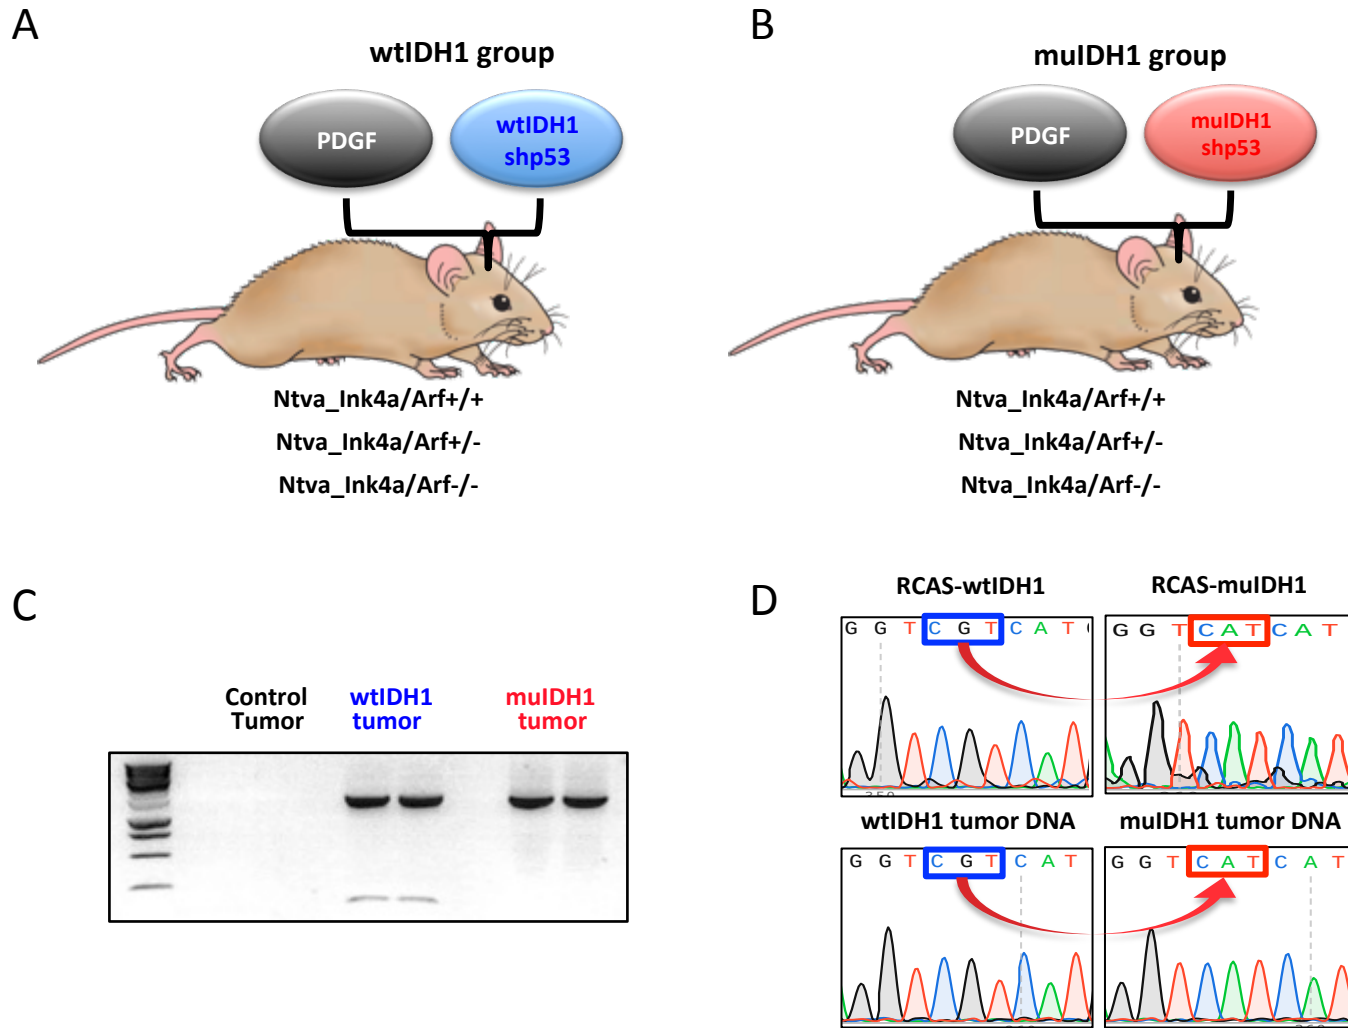

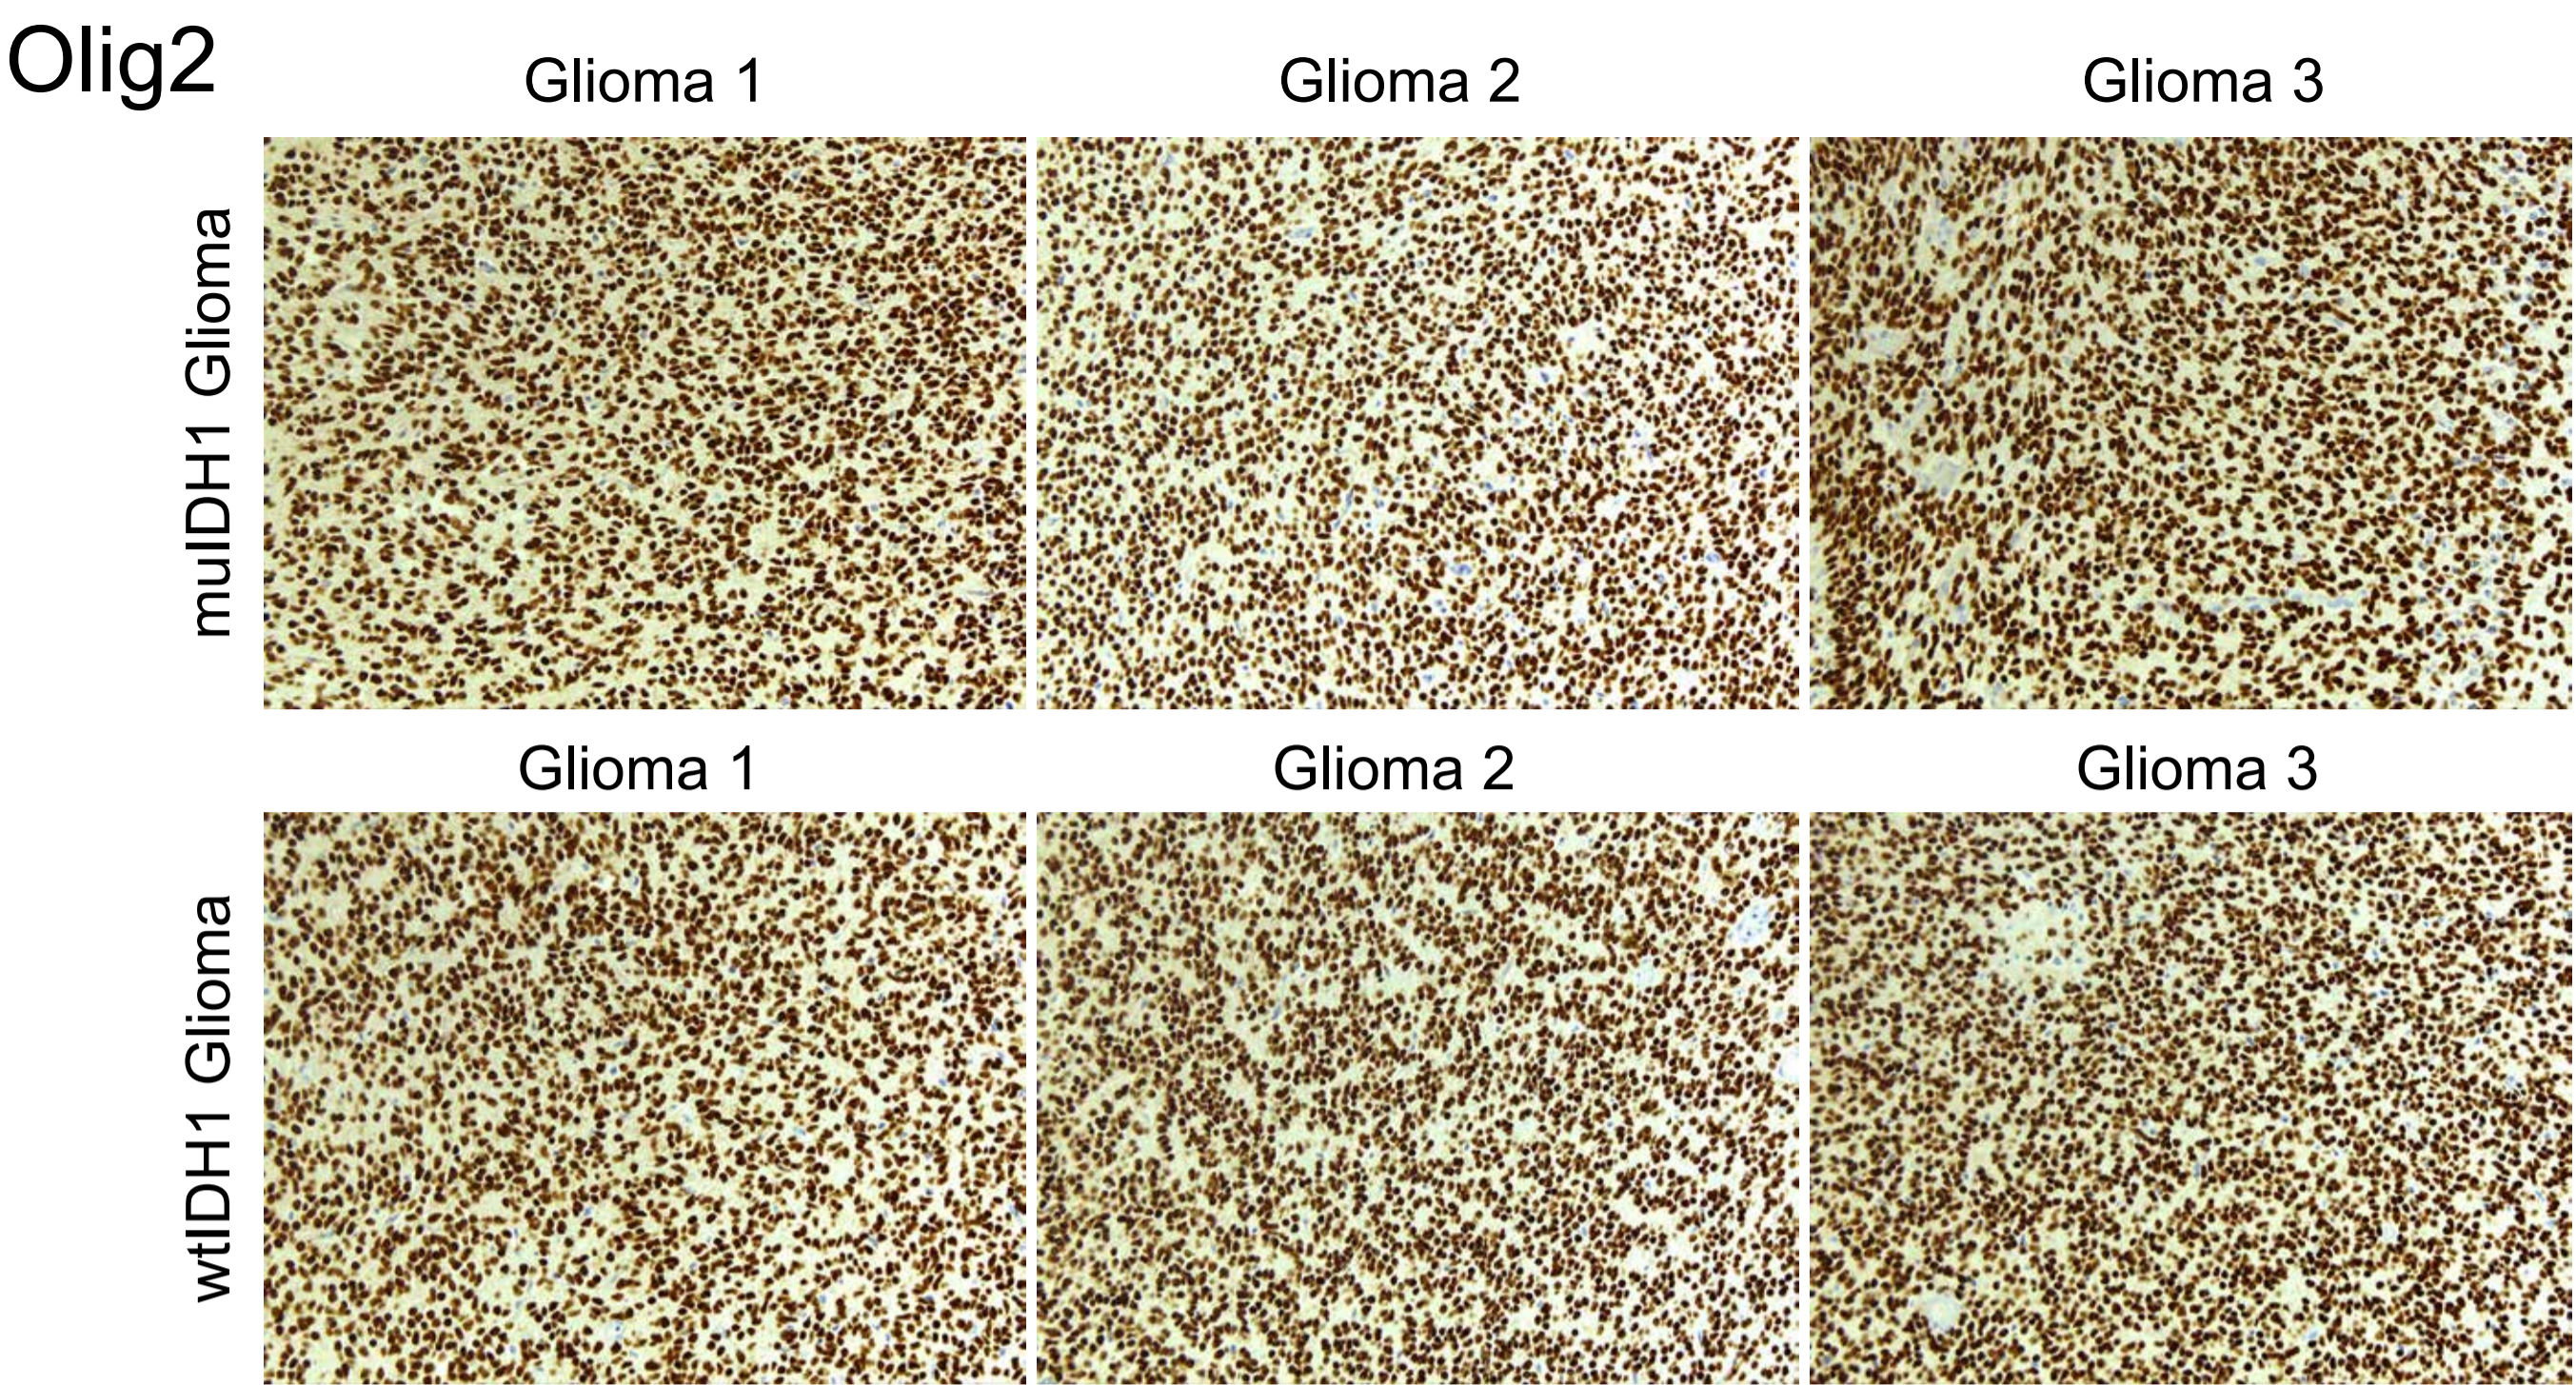

**GENESDEV/2016/294991\_Amankulor\_Supplementary Fig. 4**

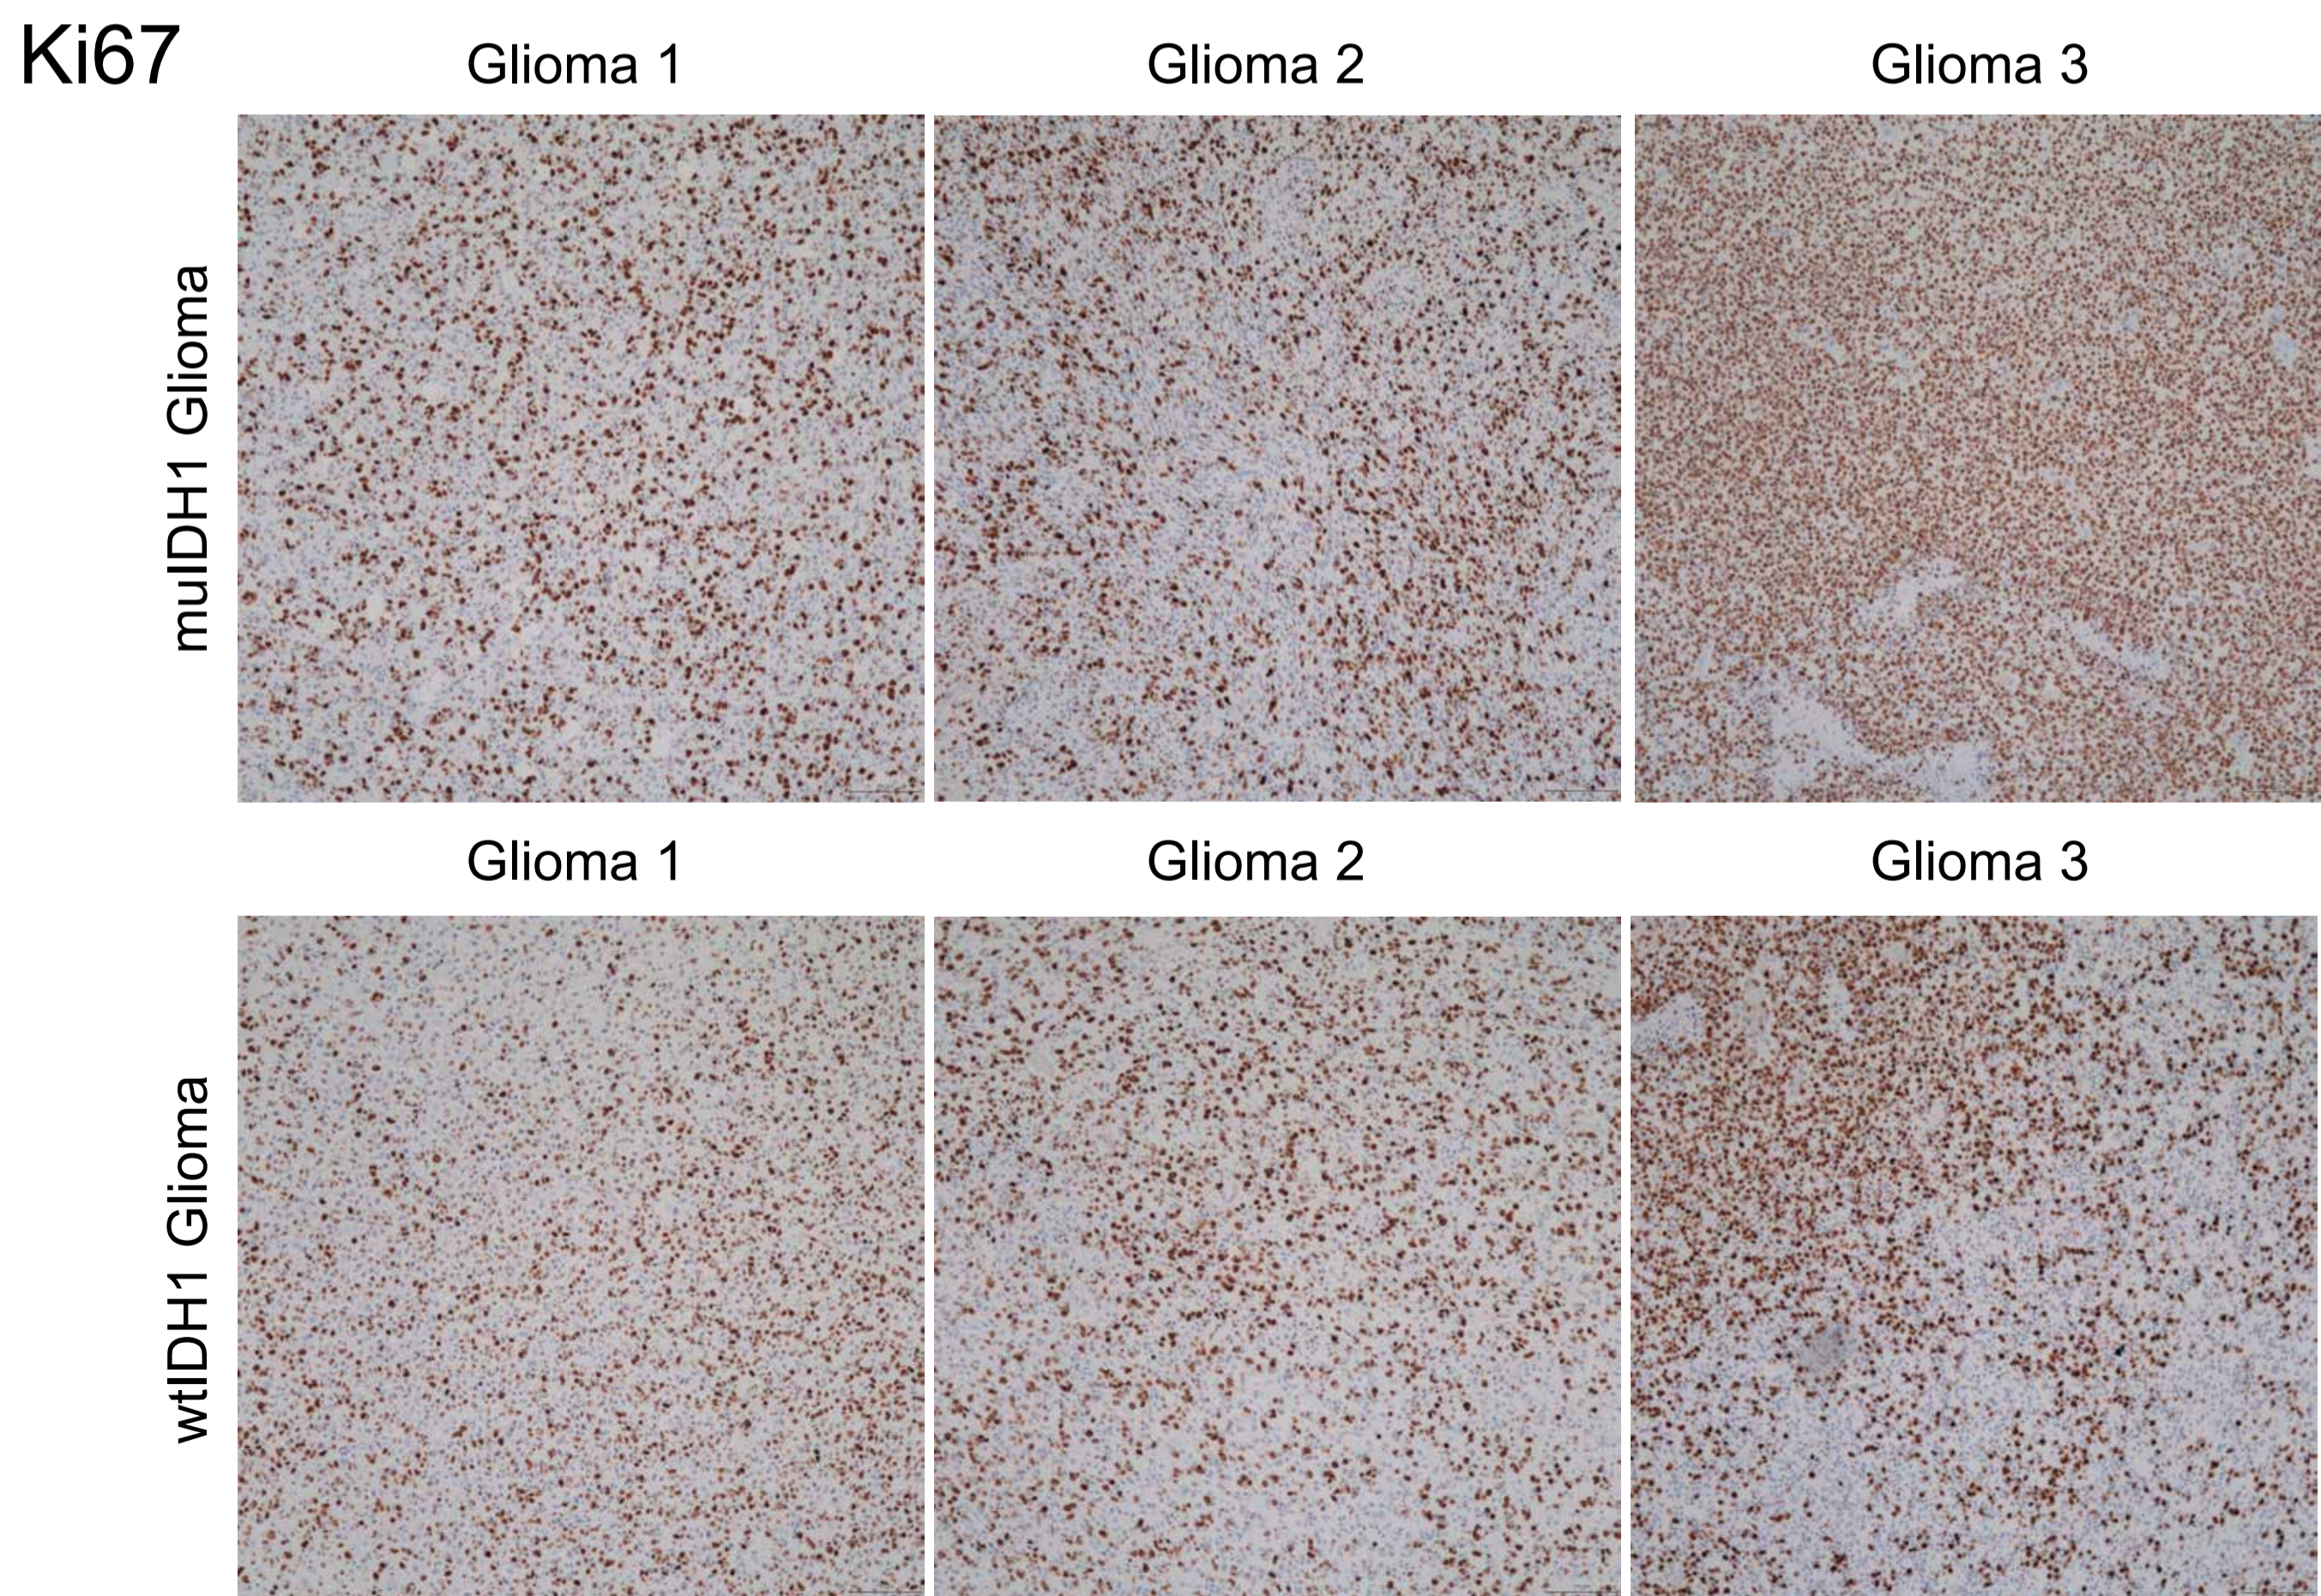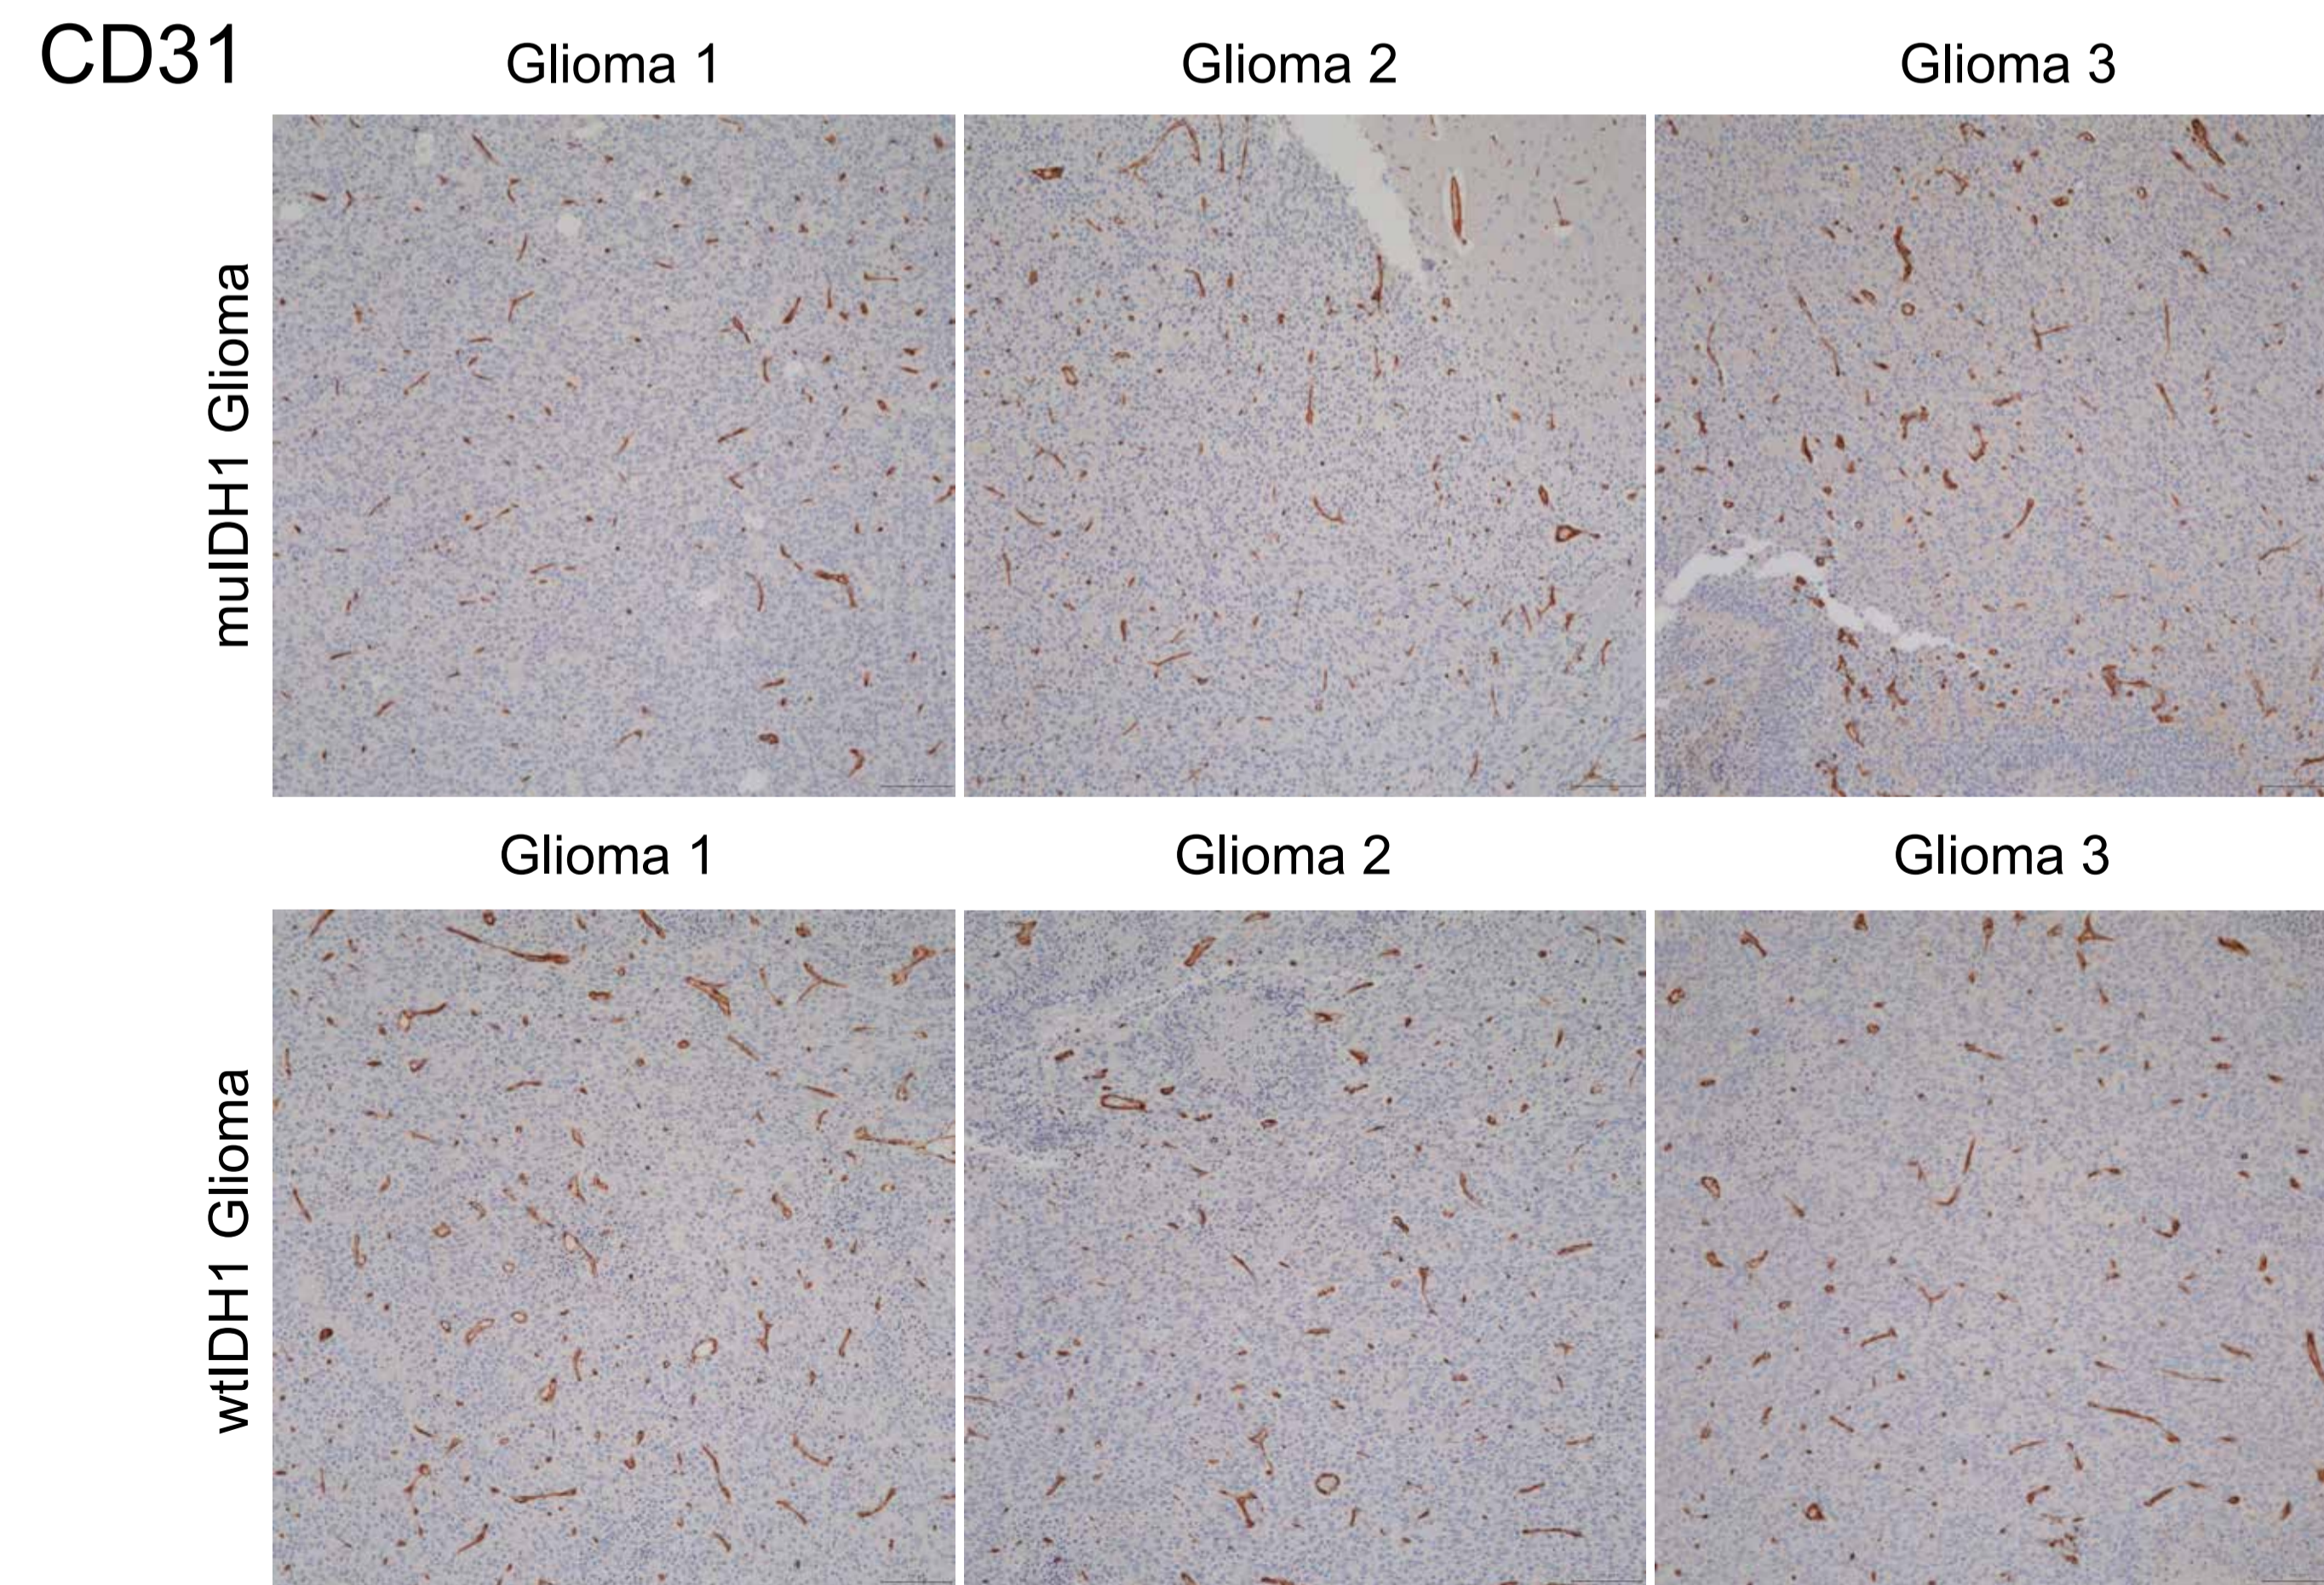

GENESDEV/2016/294991\_Amankulor\_Supplementary Fig. 5

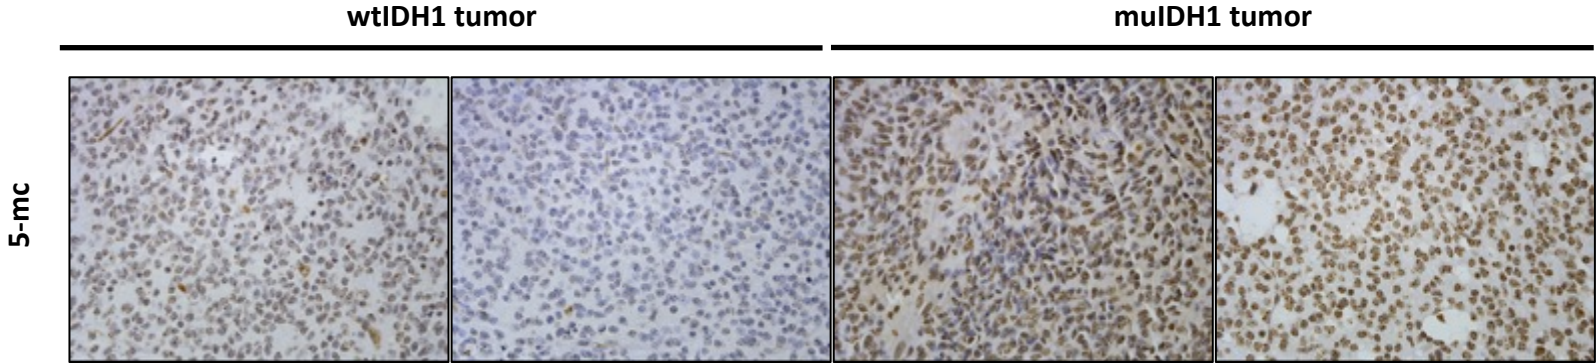

# GENESDEV/2016/294991\_Amankulor\_Supplementary Fig. 6

A

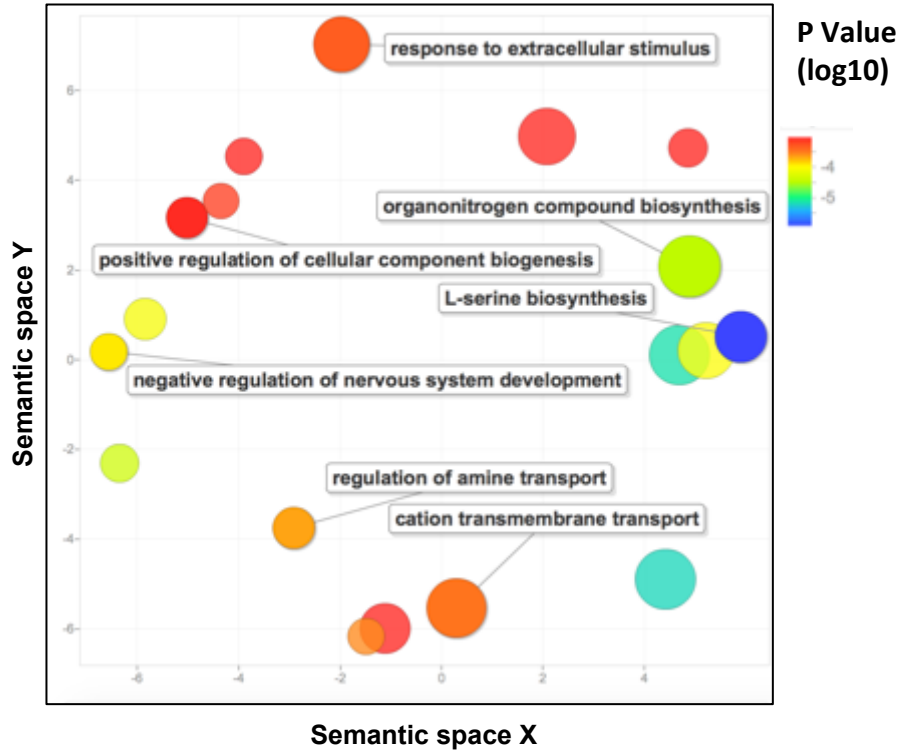

B

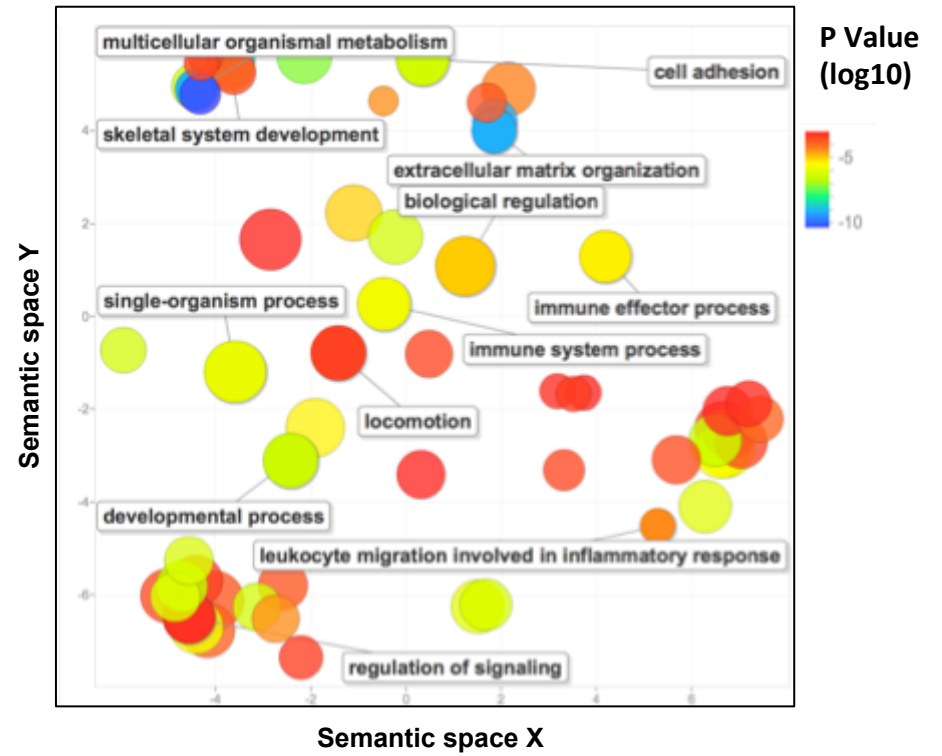



GENESDEV/2016/294991\_Amankulor\_Supplementary Fig. 7

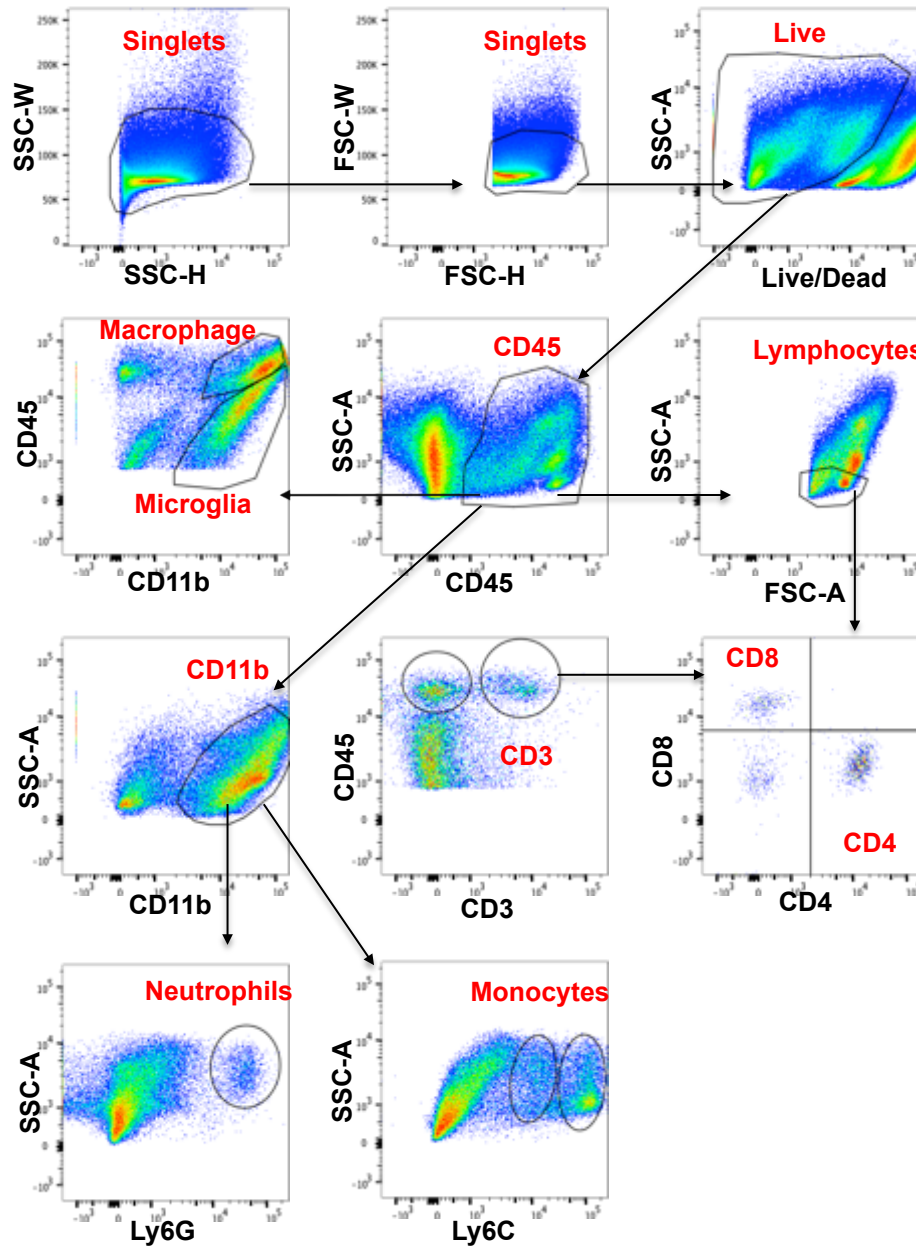

# GENESDEV/2016/294991\_Amankulor\_Supplementary Fig. 8

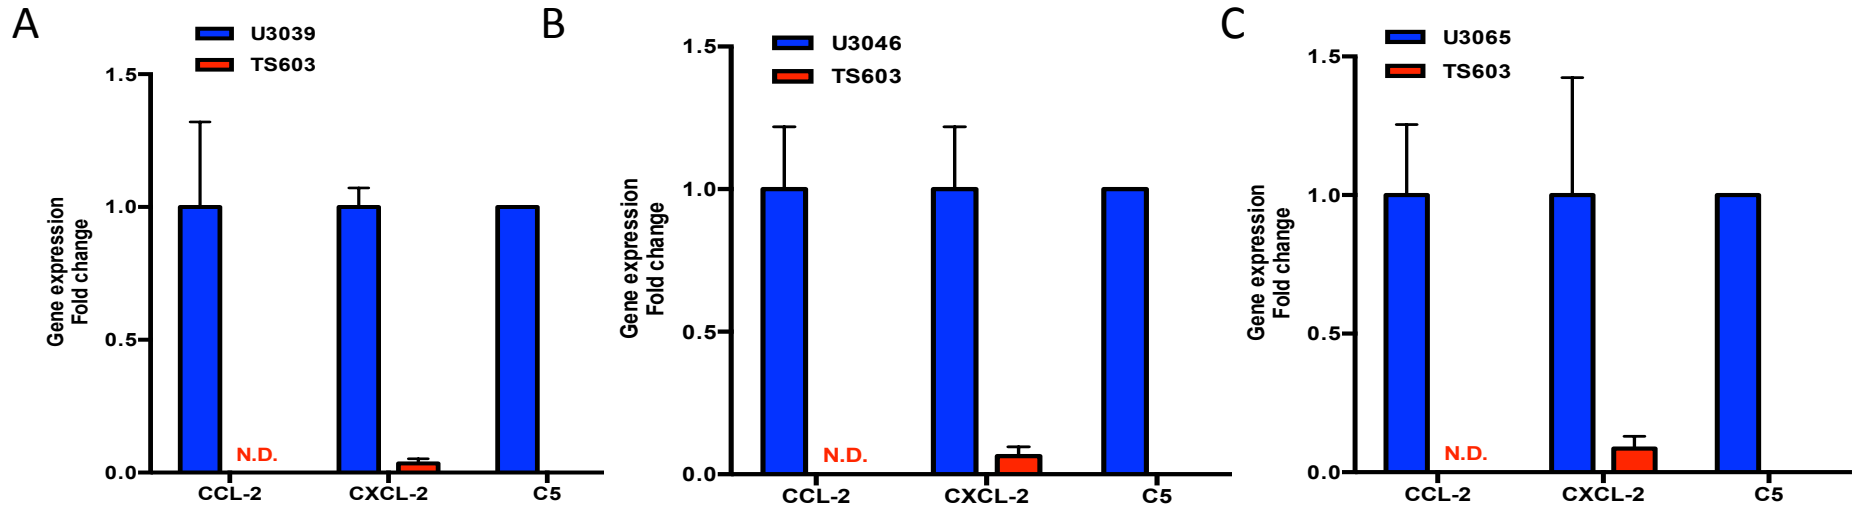

A

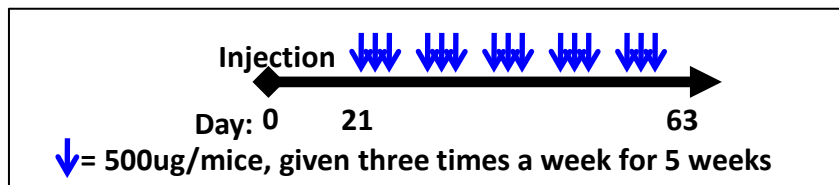

B

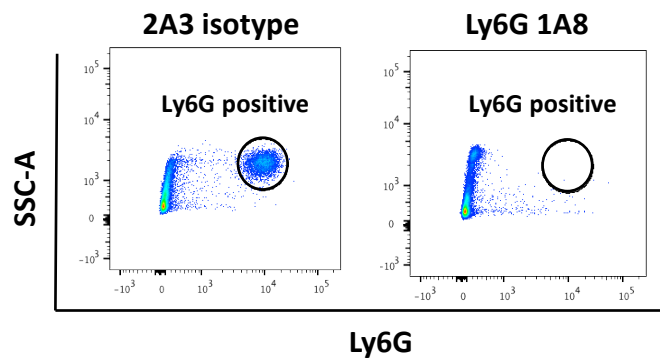

C

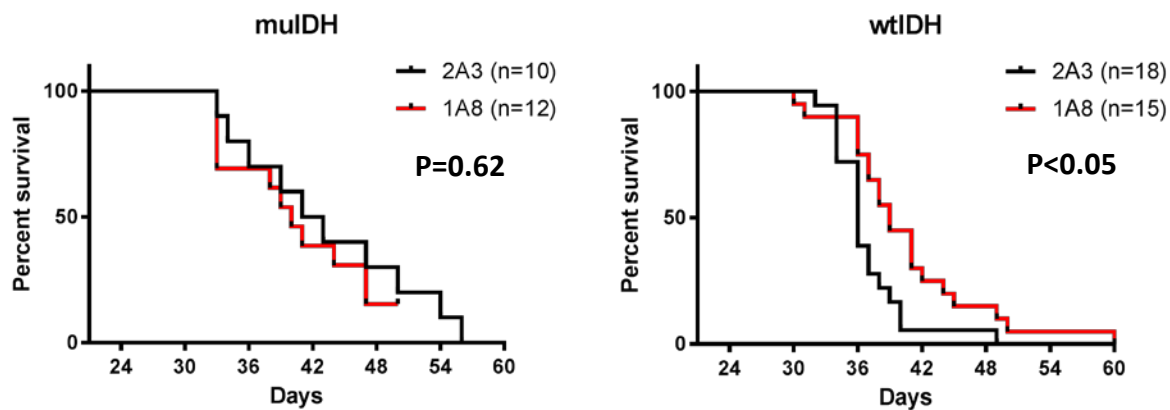

## GENESDEV/2016/294991\_Amankulor\_Supplementary Table. 1

|                                    | No of samples | No of G2 samples | No of G3 samples | No of samples with NO grade information |
|------------------------------------|---------------|------------------|------------------|-----------------------------------------|
| wtIDH1                             | 91            | 19               | 64               | 8                                       |
| astrocytoma (muIDH1 samples)       | 248           | 114              | 102              | 32                                      |
| oligodendroglioma (muIDH1 samples) | 169           | 81               | 70               | 18                                      |

## GENESDEV/2016/294991\_Amankulor\_Supplementary Table. 2

| GO term                                                     | log10 p-value | Uniqueness |
|-------------------------------------------------------------|---------------|------------|
| Multicellular organismal process (GO:0032501)               | -5.5143       | 0.93       |
| Developmental process (GO:0032502)                          | -4.7799       | 0.93       |
| Regulation of multicellular organismal process (GO:0051239) | -4.1415       | 0.88       |
| Regulation of hormone levels (GO:0051239)                   | -4.6968       | 0.86       |
| Cell-cell signaling (GO:0007267)                            | -4.8827       | 0.85       |
| Nephron tubule development (GO:0072080)                     | -6.0752       | 0.15       |
| Multicellular organismal process (GO:0032501)               | -5.5143       | 0.93       |
| Developmental process (GO:0032502)                          | -4.7799       | 0.93       |
| Regulation of multicellular organismal process (GO:0051239) | -4.1415       | 0.88       |

### GENESDEV/2016/294991\_Amankulor\_Supplementary Table 3

| GO term                                                      | log10 p-value  | Uniqueness  |
|--------------------------------------------------------------|----------------|-------------|
| Reproduction (GO:0000003)                                    | -4.4413        | 1           |
| Single-organism process (GO:0044699)                         | -5.9747        | 1           |
| <b>Immune system process (GO:0002376)</b>                    | <b>-4.7328</b> | <b>0.99</b> |
| Reproductive process (GO:0022414)                            | -4.4698        | 0.99        |
| Biological adhesion (GO:0022610)                             | -6.9914        | 0.99        |
| Multicellular organismal process (GO:0032501)                | -12.5768       | 0.99        |
| Developmental process (GO:0032502)                           | -17.9031       | 0.99        |
| Locomotion (GO:0040011)                                      | -11.1746       | 0.99        |
| Response to stimulus (GO:0050896)                            | -3.4049        | 0.99        |
| Localization of cell (GO:0051674)                            | -12.1624       | 0.97        |
| Outer dynein arm assembly (GO:0036158)                       | -4.6778        | 0.97        |
| Cell adhesion (GO:0007155)                                   | -6.6364        | 0.96        |
| Fat-soluble vitamin metabolic process (GO:0006775)           | -5.1331        | 0.95        |
| Cell proliferation (GO:0008283)                              | -7.8697        | 0.94        |
| Vitamin metabolic process (GO:0006766)                       | -4.5436        | 0.93        |
| Cellular component movement (GO:0006928)                     | -11.9747       | 0.92        |
| Single-organism catabolic process (GO:0044712)               | -3.3206        | 0.92        |
| Response to wounding (GO:0009611)                            | -6.9066        | 0.92        |
| Response to external stimulus (GO:0009605)                   | -8.0991        | 0.91        |
| Microtubule bundle formation (GO:0001578)                    | -9.0209        | 0.91        |
| Extracellular structure organization (GO:0043062)            | -19.0862       | 0.91        |
| Extracellular matrix organization (GO:0030198)               | -19.1475       | 0.9         |
| Negative regulation of hydrolase activity (GO:0051346)       | -3.1476        | 0.89        |
| Regulation of multicellular organismal process (GO:0051239)  | -13.8447       | 0.88        |
| Negative regulation of biological process (GO:0048519)       | -4.3107        | 0.87        |
| Cellular response to vitamin (GO:0071295)                    | -4.1805        | 0.86        |
| Negative regulation of viral genome replication (GO:0045071) | -7.9586        | 0.84        |
| Regulation of cell proliferation (GO:0042127)                | -7.3958        | 0.84        |
| Cell motility (GO:0048870)                                   | -12.1624       | 0.82        |
| Collagen catabolic process (GO:0030574)                      | -13.767        | 0.53        |
| Anatomical structure morphogenesis (GO:0009653)              | -25.3063       | 0.39        |

## GENESDEV/2016/294991\_Amankulor\_Supplementary Table 4

| GO term                                                     | Human         |             | Mouse         |             |
|-------------------------------------------------------------|---------------|-------------|---------------|-------------|
| GO term                                                     | Log10 p-value | Uniqueness  | Log10 p-value | Uniqueness  |
| Single-organism process (GO:0044699)                        | -5.9747       | 1           | -9.1925       | 1           |
| <b>Immune system process (GO:0002376)</b>                   | -4.7328       | <b>0.99</b> | -13.5452      | <b>0.99</b> |
| Biological adhesion (GO:0022610)                            | -6.9914       | 0.99        | -14.3206      | 0.99        |
| Multicellular organismal process (GO:0032501)               | -12.5768      | 0.99        | -6.1925       | 0.99        |
| Developmental process (GO:0032502)                          | -17.9031      | 0.99        | -9.3936       | 0.99        |
| Locomotion (GO:0040011)                                     | -11.1746      | 0.99        | -16.2924      | 0.99        |
| Response to stimulus (GO:0050896)                           | -3.4049       | 0.99        | -4.9872       | 0.99        |
| Localization of cell (GO:0051674)                           | -12.1624      | 0.97        | -14.1186      | 0.94        |
| Cell adhesion (GO:0007155)                                  | -6.6364       | 0.96        | -14.4802      | 0.97        |
| Cell proliferation (GO:0008283)                             | -7.8697       | 0.94        | -7.9136       | 0.95        |
| Cellular component movement (GO:0006928)                    | -11.9747      | 0.92        | -11.8069      | 0.92        |
| Response to wounding (GO:0009611)                           | -6.9066       | 0.92        | -13.58        | 0.82        |
| Response to external stimulus (GO:0009605)                  | -8.0991       | 0.91        | -16.0128      | 0.81        |
| Extracellular structure organization (GO:0043062)           | -19.0862      | 0.91        | -9.4868       | 0.9         |
| Extracellular matrix organization (GO:0030198)              | -19.1475      | 0.9         | -9.5258       | 0.9         |
| Regulation of multicellular organismal process (GO:0051239) | -13.8447      | 0.88        | -10.3116      | 0.79        |
| Negative regulation of biological process (GO:0048519)      | -4.3107       | 0.87        | -9.3979       | 0.77        |
| Regulation of cell proliferation (GO:0042127)               | -7.3958       | 0.84        | -8.6055       | 0.74        |

## GENESDEV/2016/294991\_Amankulor\_Supplementary Table. 5

| Antigen | Label         | Manufacture | ul/test |
|---------|---------------|-------------|---------|
| CD45    | AlexaFluor700 | Biolegend   | 0.125   |
| CD3ε    | BV711         | BD          | 4       |
| CD4     | BV786         | BD          | 0.625   |
| CD8a    | PerCPCy5.5    | Biolegend   | 0.625   |
| gdTCR   | BV421         | Biolegend   | 1.25    |
| CD49b   | PE            | Biolegend   | 2       |
| CD19    | PE-Cy7        | BD          | 0.25    |
| CD11b   | APC           | Ebioscience | 0.5     |
| Ly6C    | BV605         | Biolegend   | 2.5     |
| Ly6G    | PECF594       | BD          | 0.25    |
| FVD     | eFL780        | Ebioscience | 0.15    |
